# Supplementary material for: Effect of gut microbiome on minor complications after a colonoscopy
Source: PubMed Central journal article supplement — Intest Res. 2020 Nov 10;19(3):341–8. doi: 10.5217/ir.2020.00057 (PMC8322026; doi:10.5217/ir.2020.00057), 2020-11-10
Supplement: ir-2020-00057-suppl1.pdf [file ir-2020-00057-suppl1.pdf]

See “Effect of gut microbiome on minor complications after a colonoscopy” on page 341-348.

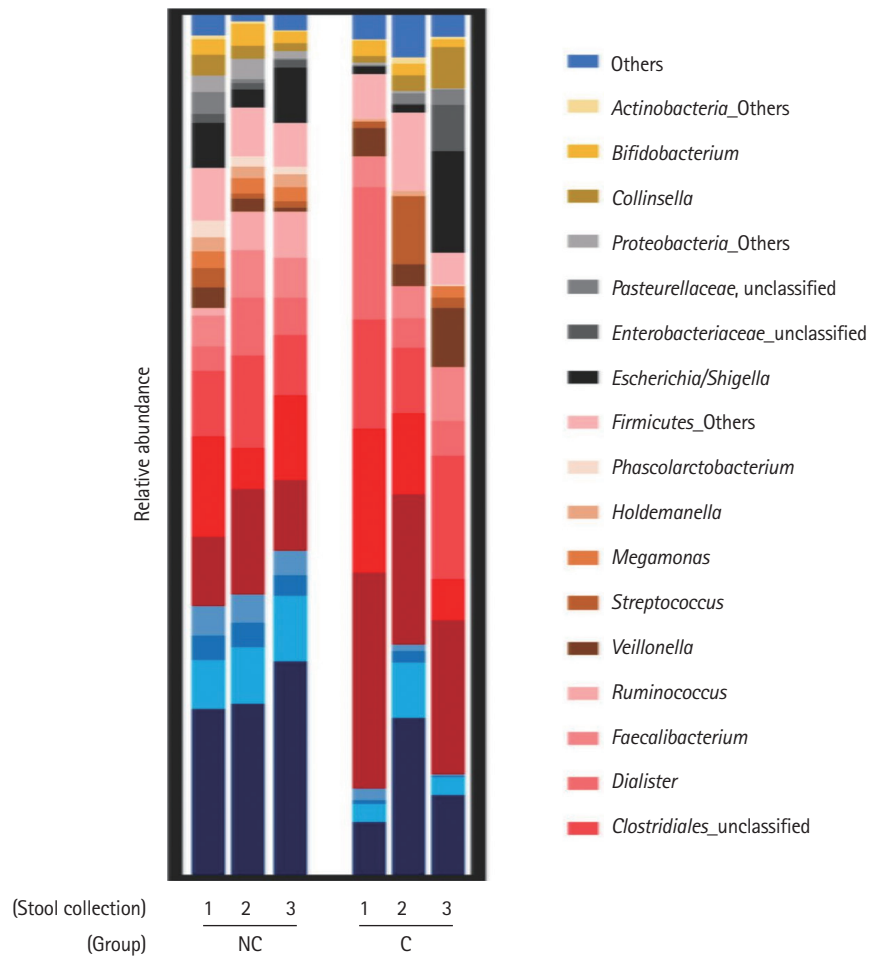

**Supplementary Fig. 1.** Composition of bacterial communities at the genus level in the 2 groups–no complication group (NC) and complication group (C)–according to the timing of the stool collection (1, before bowel preparation; 2, on the 7th day after colonoscopy; 3, on the 28th day after colonoscopy).
